# Supplementary material for: Association between high fatty liver index and development of colorectal cancer: a nationwide cohort study with 21,592,374 Korean
Source: PubMed Central journal article supplement — Korean J Intern Med. 2020 Apr 10;35(6):1354–63. doi: 10.3904/kjim.2018.022 (PMC7652640; doi:10.3904/kjim.2018.022), 2020-04-10
Supplement: kjim-2018-022-suppl2.pdf [file kjim-2018-022-suppl2.pdf]

**Supplementary Table 2. Incidence and hazard ratios of colorectal cancer according to change of FLI at 2 years follow-up compared to the baseline**

| FLI  |      | Number    | CRC, n | Duration, person-years | IR <sup>a</sup> | HR (95% CI)          |                      |                      |
|------|------|-----------|--------|------------------------|-----------------|----------------------|----------------------|----------------------|
| Pre  | Post |           |        |                        |                 | Model 1 <sup>b</sup> | Model 2 <sup>c</sup> | Model 3 <sup>d</sup> |
| < 60 | < 60 | 5,707,716 | 28,811 | 24,139,856             | 1.19            | 1 (reference)        | 1 (reference)        | 1 (reference)        |
|      | ≥ 60 | 293,991   | 1,588  | 1,227,701              | 1.29            | 1.09 (1.03–1.14)     | 1.10 (1.04–1.15)     | 1.09 (1.04–1.15)     |
| ≥ 60 | < 60 | 263,706   | 2,053  | 1,103,286              | 1.86            | 1.56 (1.49–1.63)     | 1.29 (1.23–1.35)     | 1.28 (1.22–1.34)     |
|      | ≥ 60 | 474,574   | 2,647  | 1,984,898              | 1.33            | 1.12 (1.08–1.16)     | 1.14 (1.09–1.19)     | 1.13 (1.08–1.17)     |

FLI, fatty liver index; CRC, colorectal cancer; IR, incidence rate; HR, hazard ratios; CI, confidential interval.

<sup>a</sup>1,000 person-year.

<sup>b</sup>Unadjusted.

<sup>c</sup>Data are adjusted for age, sex.

<sup>d</sup>Data are adjusted for age, sex, smoking status, alcohol consumption, regular physical exercise and income.
